# Supplementary material for: Association between coffee consumption and psychological stress with gastroesophageal reflux disease among Indonesian medical students
Source: Research Square preprint supplement (doi:10.21203/rs.3.rs-7584587/v1), 2025-10-29
Supplement: Supplementary file 1 [file 430772b5848ee4e57580586a.docx]

**Modified Coffee Consumption Questionnaire – English Version**

1. Do you regularly drink coffee?
   a. Yes
   b. No
2. How frequently do you consume coffee?
   a. Rarely (once to three times per month)
   b. Occasionally (once a week to once a day)
   c. Daily
3. How many cups of coffee do you usually consume per day?
   a. 0–2 cups per day
   b. 3–4 cups per day
   c. ≥5 cups per day
4. For how long have you been consuming coffee?
   a. 0–1 year
   b. 2–3 years
   c. ≥4 years
5. What type of coffee do you usually drink?
   a. Decaffeinated coffee
   b. Instant coffee
   c. Pure/ground coffee
6. Does the coffee you drink contain additional ingredients?
   (e.g., milk, sugar, creamer, etc.)
   a. Yes
   b. No
7. Do you always add additional ingredients to your coffee?
   a. Rarely
   b. Occasionally
   c. Always

**Modified Coffee Consumption Questionnaire – Bahasa Indonesia Version**

KUESIONER KONSUMSI KOPI

1. Apakah anda rutin meminum kopi?

a. Ya

b. Tidak

2. Seberapa sering Anda meminum kopi?

A. Jarang (sekali sebulan-3 kali dalam sebulan)

B. Sesekali (sekali seminggu-sekali sehari)

C. Setiap hari

3. Berapa cangkir/gelas kopi yang dikonsumsi per hari?

a. 0-2 cangkir sehari

b. 3-4 cangkir sehari

c. ≥5 cangkir sehari

4. Sudah berapa lama Anda mengonsumsi kopi?

a. 0-1 tahun

b. 2-3 tahun

c. ≥4 tahun

5. Jenis kopi yang biasa anda minum selama ini?

a. Kopi dekafeinasi

b. Kopi instan

c. Kopi murni

6. Apakah kopi yang anda minum memiliki campuran bahan lain?

(susu, gula, krimer dll)

a. Ya

b. Tidak

7. Apakah kopi yang anda minum SELALU memiliki campuran bahan lain?

a. Jarang

b. Sesekali

c. Selal
